# Supplementary material for: A dye encapsulated zinc-based metal–organic framework as a dual-emission sensor for highly sensitive detection of antibiotics
Source: Royal Society of Chemistry journal article supplement (doi:10.1039/d1dt03950d), 2021-11-30
Supplement: d1dt03950d1.pdf [file d1dt03950d1.pdf]

# **Electronic Supporting Information**

## **Dye encapsulated zinc-based metal-organic framework as a dual-emission sensor for highly sensitive detection of antibiotics**

Kang Wang, Yuhan Duan, Jiajing Chen, Haiying Wang\* and Huiyan Liu\*

School of Chemistry & Materials Science, Jiangsu Key Laboratory of Green Synthetic Chemistry for Functional Materials, Jiangsu Normal University, Xuzhou 221116, P. R. China

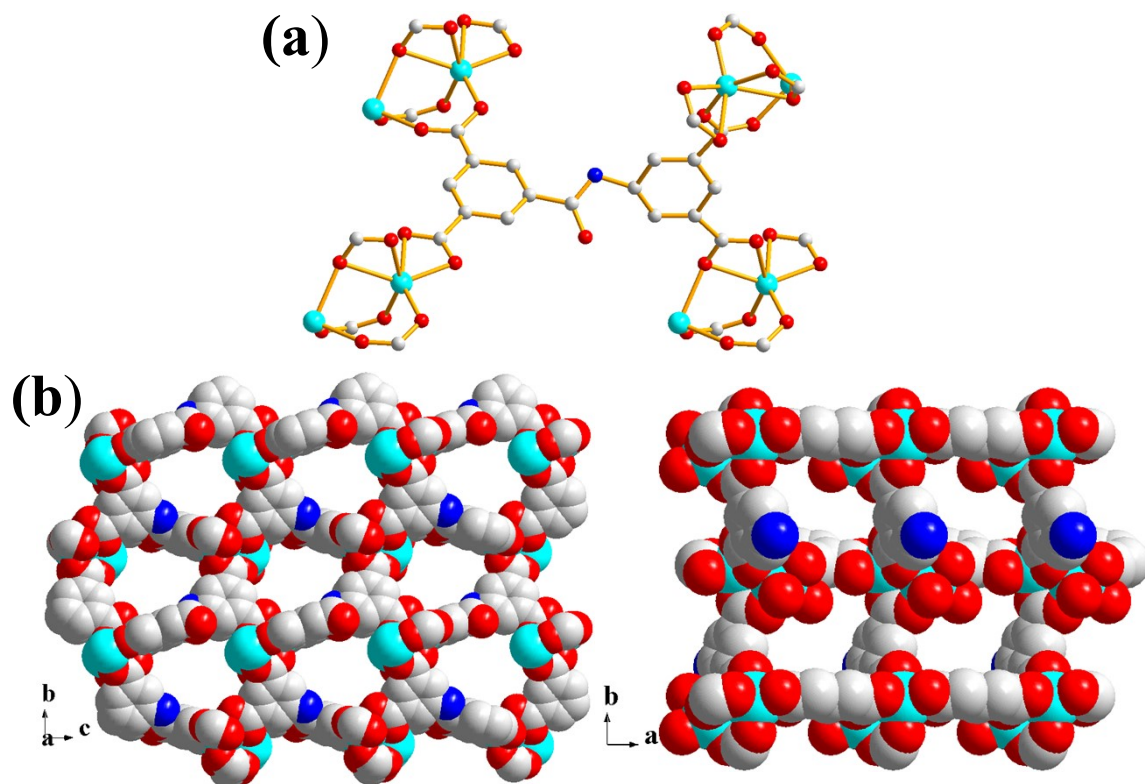

**Fig. S1** (a) The coordination modes of H<sub>4</sub>L in **1**. (b) Space-filling representation of 3D framework of **1** showing channels of approximate dimension  $7.3 \times 6.1 \text{ \AA}^2$  and  $6.6 \times 6.3 \text{ \AA}^2$  (point-to-point and excluding van der Waals radii) along the *a* axis and *c* axis, respectively.

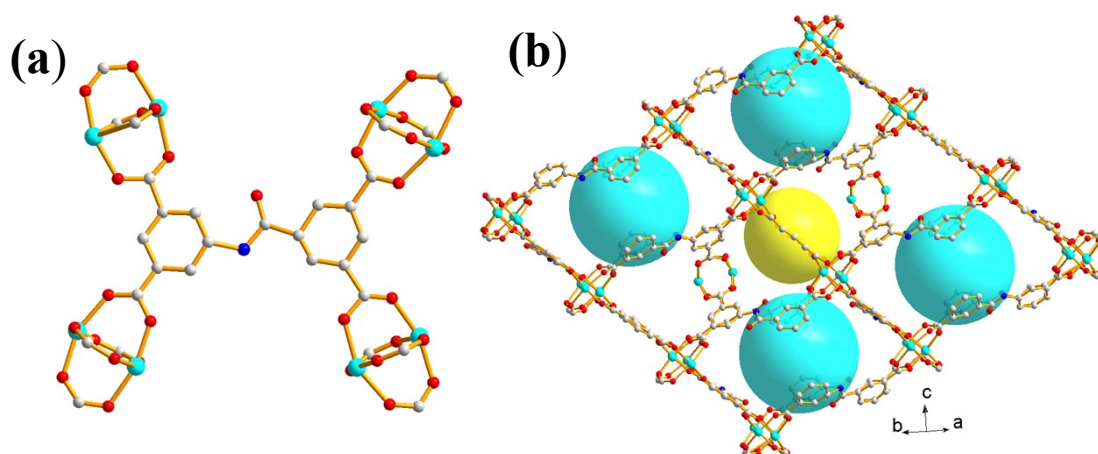

**Fig. S2** (a) The coordination modes of H<sub>4</sub>L in **2**. (b) Ball-and-stick representation of 3D framework of **2**.

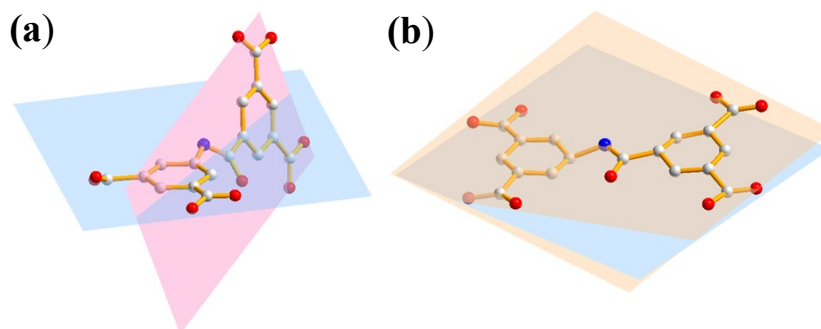

**Fig. S3** (a) Conformation of  $L^4$  linker in **1** in which the two terminal isophthalic moieties are not coplanar with a dihedral angle of about  $77.1^\circ$ . (b) Conformation of  $L^4$  linker in **2** with four carboxyl groups are almost in the same plane.

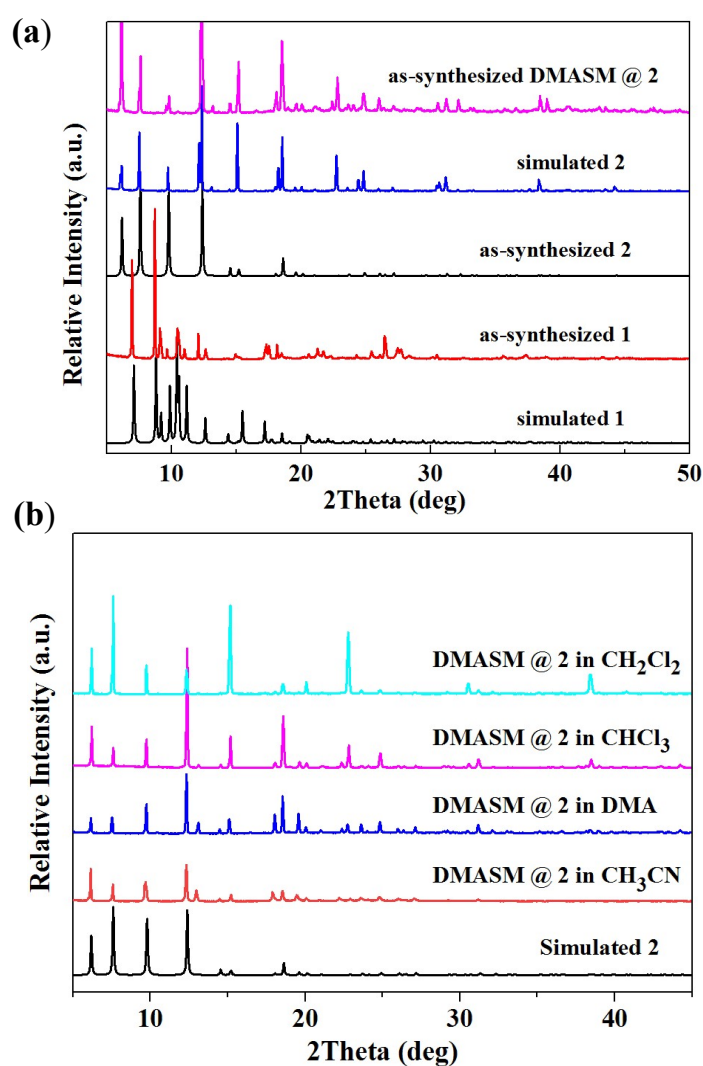

**Fig. S4** PXRD patterns of **1**, **2** and **DMASM@2** (a) and **DMASM@2** in common solvents (b).

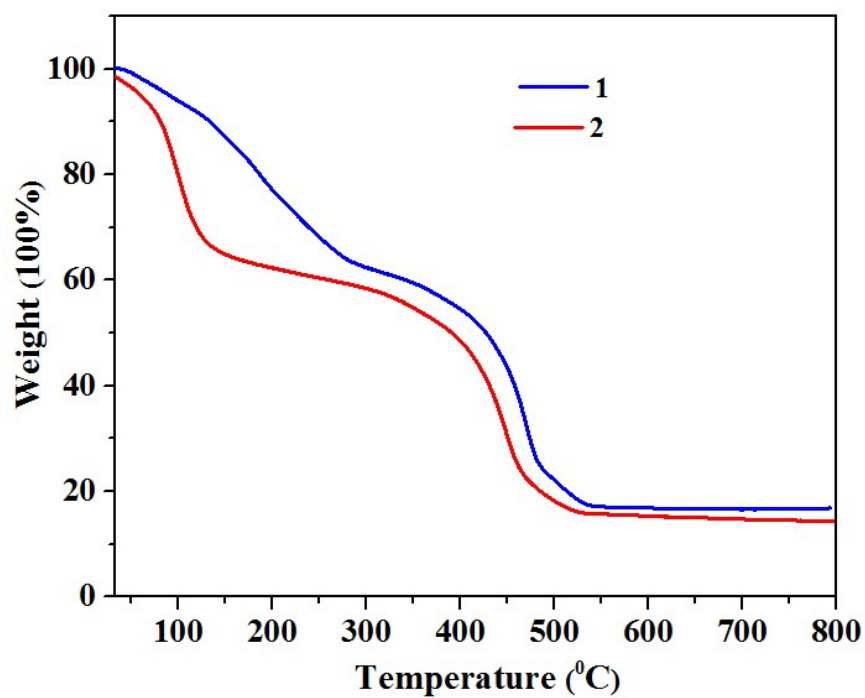

Fig. S5 TG curves of as-synthesized 1 and 2.

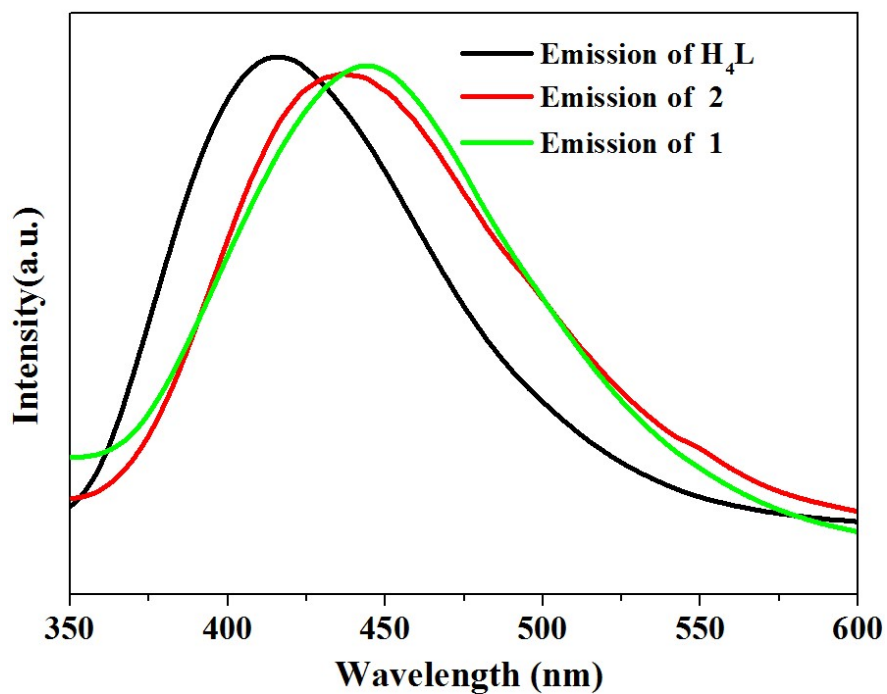

Fig. S6 Solid-state luminescence spectra of H<sub>4</sub>L, 1 and 2 at room temperature.

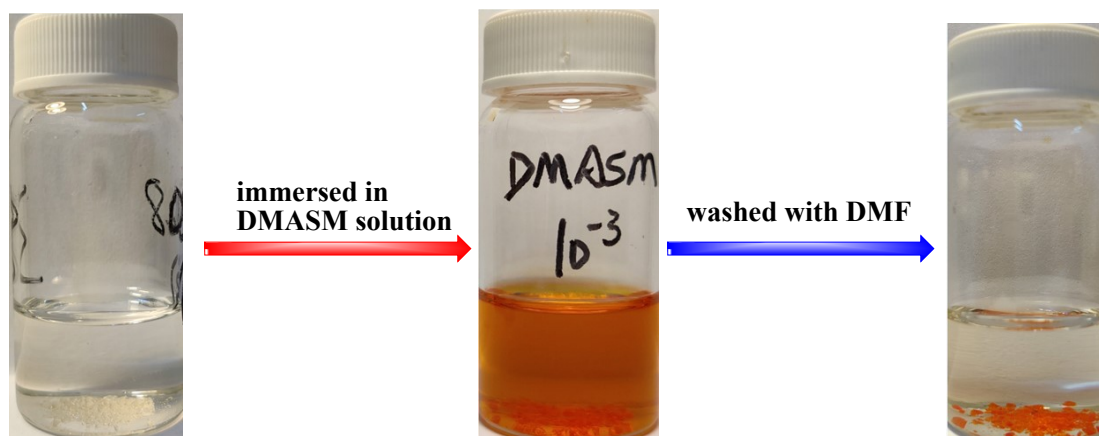

**Fig. S7** The pristine **2** before and after immersed in DMF solution of DMASM (1 mM) at 60 °C for 5 days.

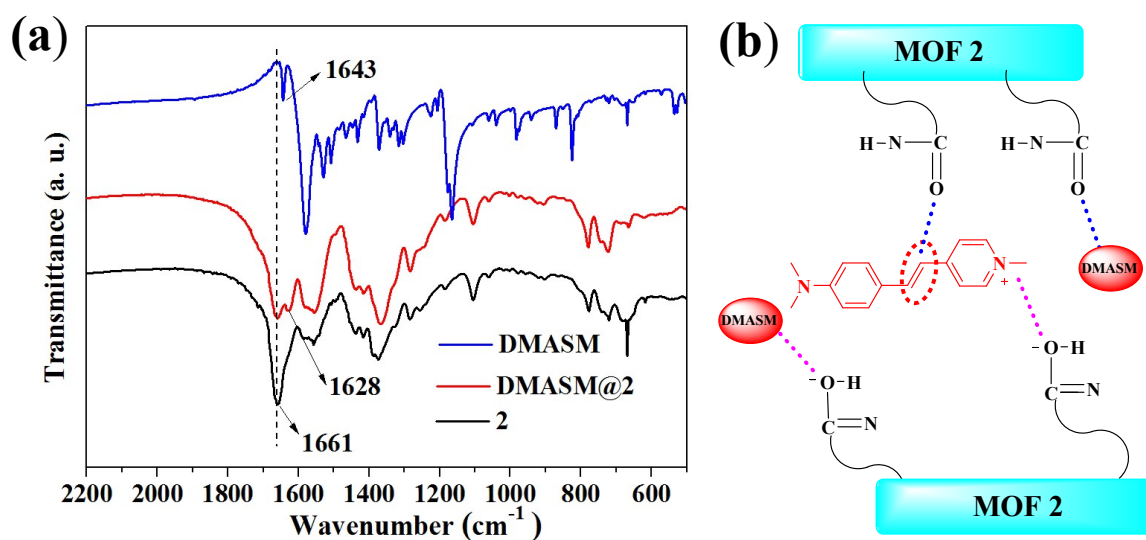

**Fig. S8** (a) Portions of FTIR spectra recorded for **2**, **DMASM@2** and **DMASM**. (b) Possible interaction mechanism between **DMASM** and **2**.

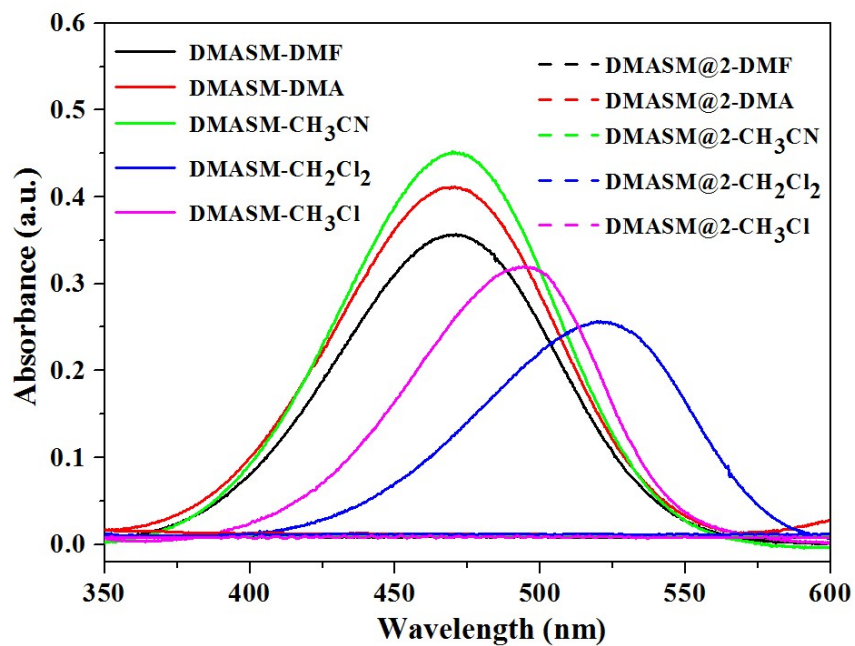

**Fig. S9** UV-Vis spectra of **DMASM** in several solvents (DMF, DMA, CH<sub>3</sub>CN, CH<sub>2</sub>Cl<sub>2</sub> and CH<sub>3</sub>Cl) and the spectra of **DMASM@2** after immersed in these solvents for 48 h and separated.

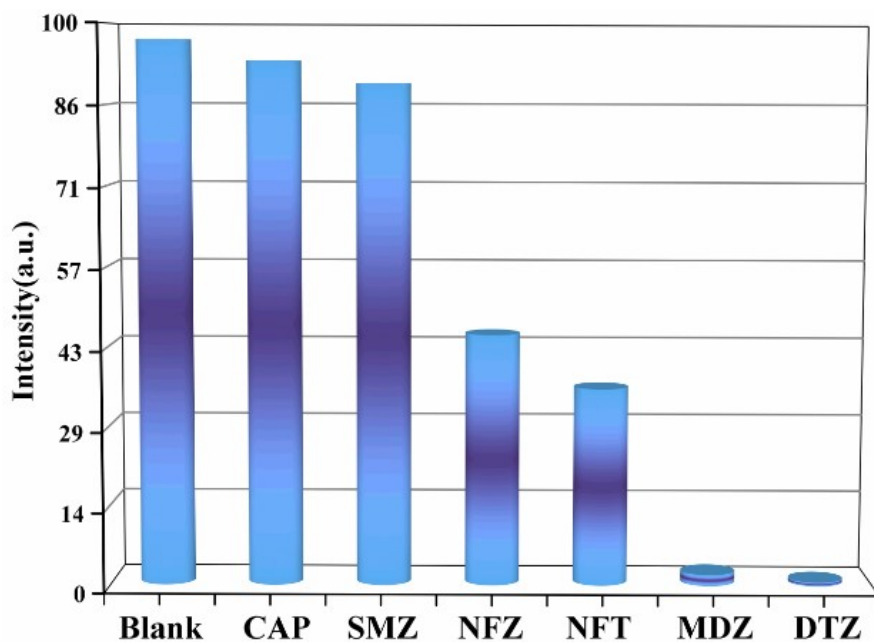

**Fig. S10** Comparison of the fluorescence intensity of **DMASM@2** with different antibiotics.

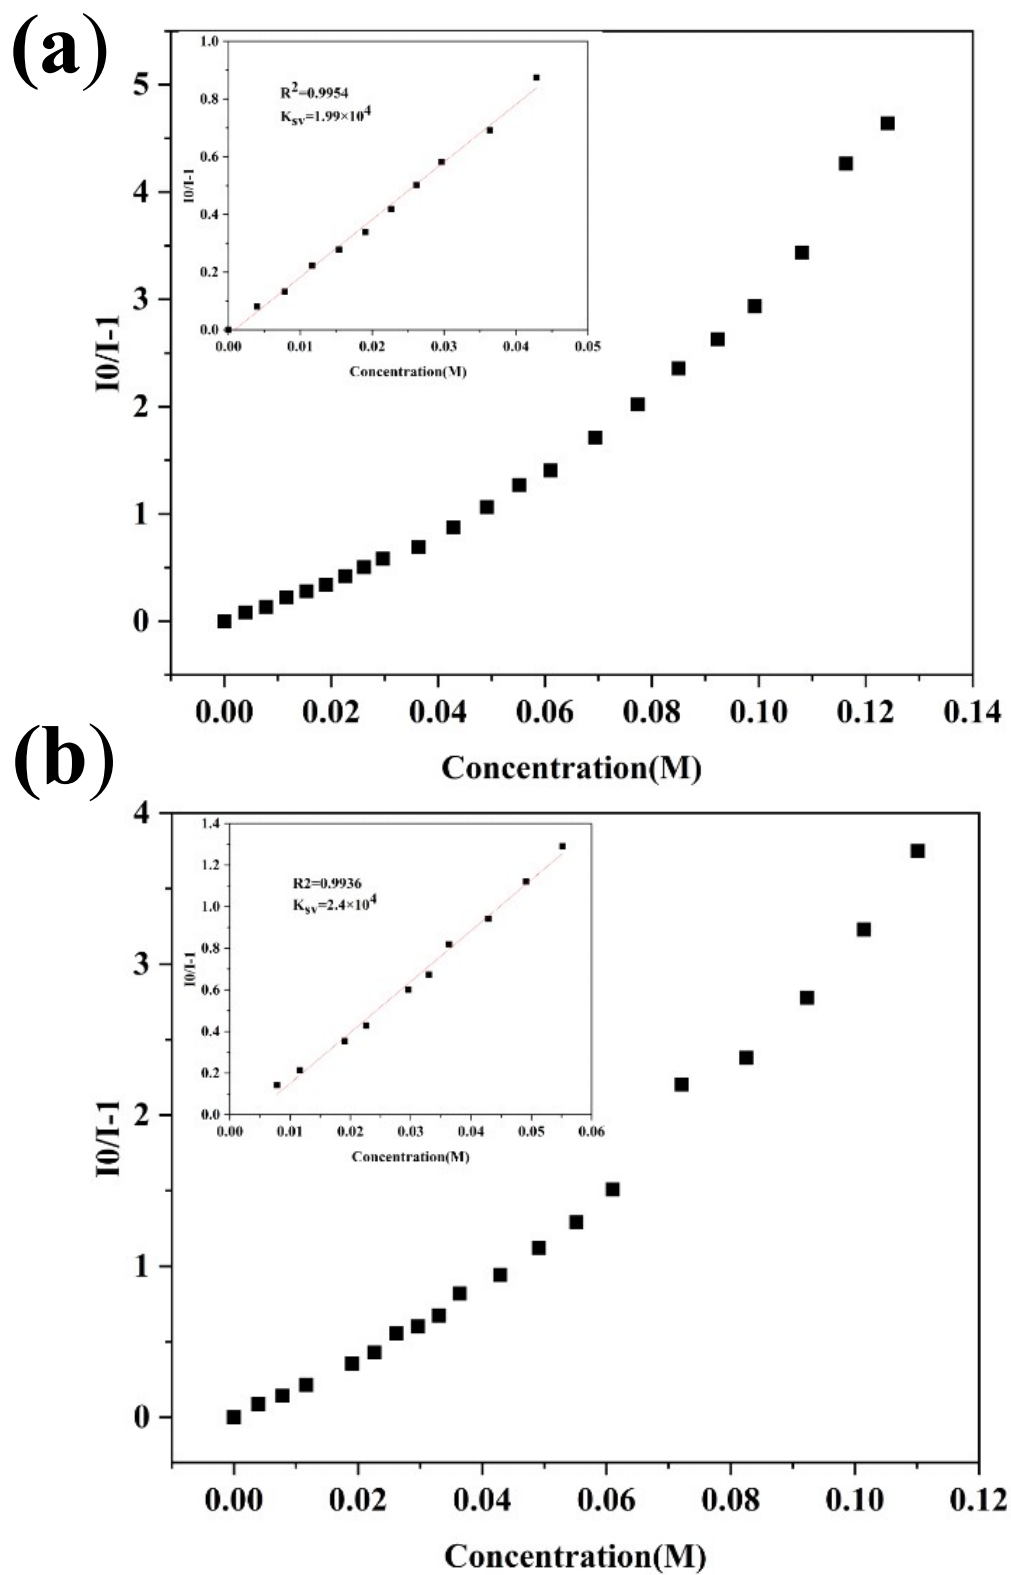

Fig. S11 The Stern-Volmer plots for 2 with MDZ (a) and DTZ (b).



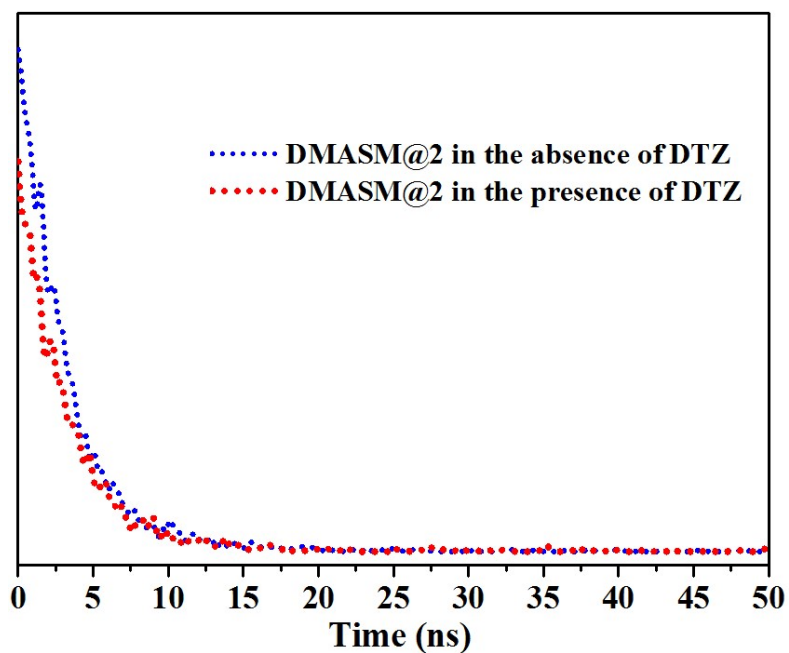

**Fig. S12** Luminescence decay curves for DMF dispersion of **DMASM@2** in the absence and presence of DTZ (0.5 mM).

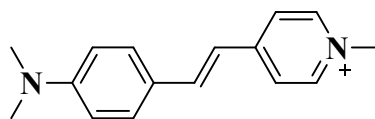

**Scheme S1** Schematic structural illustration of fluorescent dye 4-[*p*-(dimethylamino)styryl]-1-methylpyridinium (DMASM).

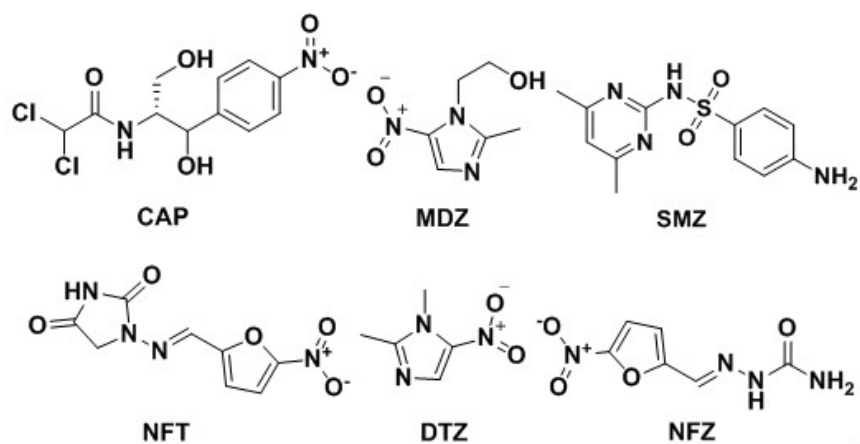

**Scheme S2** Schematic structural illustration of six antibiotics used.

**Table S1** Summary of some MOF-based luminescent materials for sensing antibiotics



| MOFs or dye@MOF                                                                                                    | $K_{SV} (M^{-1})$  | antibiotic | reference |
|--------------------------------------------------------------------------------------------------------------------|--------------------|------------|-----------|
| [NaCd <sub>2</sub> (L)(BDC) <sub>2.5</sub> ] $\cdot$ 9H <sub>2</sub> O                                             | $5.06 \times 10^4$ | NZF        | 1         |
|                                                                                                                    | $3.57 \times 10^4$ | NFT        | 1         |
|                                                                                                                    | $1.83 \times 10^4$ | FZD        | 1         |
| [Cd <sub>2</sub> (L)(2,6-NDC) <sub>2</sub> ] $\cdot$ DMF $\cdot$ 5H <sub>2</sub> O                                 | $1.04 \times 10^5$ | NZF        | 1         |
|                                                                                                                    | $7.19 \times 10^4$ | NFT        | 1         |
|                                                                                                                    | $6.38 \times 10^4$ | FZD        | 1         |
| MOG (Eu)                                                                                                           | $2.9 \times 10^4$  | RDZ        | 2         |
|                                                                                                                    | $2.1 \times 10^4$  | ODZ        | 2         |
|                                                                                                                    | $2.3 \times 10^4$  | MDZ        | 2         |
|                                                                                                                    | $1.4 \times 10^4$  | DTZ        | 2         |
| [Cd <sub>3</sub> (DBPT) <sub>2</sub> (H <sub>2</sub> O) <sub>4</sub> ] $\cdot$ 5H <sub>2</sub> O                   | $2.4 \times 10^4$  | ONZ        | 3         |
|                                                                                                                    | $2.0 \times 10^4$  | MNZ        | 3         |
|                                                                                                                    | $1.7 \times 10^4$  | DMZ        | 3         |
|                                                                                                                    | $1.1 \times 10^4$  | 2-M-5-MZ   | 3         |
| Zn-PDC/Tb <sup>3+</sup>                                                                                            | $1.1 \times 10^5$  | CFX        | 4         |
| [Me <sub>2</sub> NH <sub>2</sub> ][In(L)] $\cdot$ 2.5NMF $\cdot$                                                   | $3.35 \times 10^4$ | NZF        | 5         |
| [Eu <sub>2</sub> (BCA) <sub>3</sub> (H <sub>2</sub> O)(DMF) <sub>3</sub> ] $\cdot$ 0.5DMF $\cdot$ H <sub>2</sub> O | $2.2 \times 10^4$  | NFZ        | 6         |
|                                                                                                                    | $1.6 \times 10^4$  | NFT        | 6         |
| [Eu <sub>2</sub> (2,3'-oba) <sub>3</sub> (phen) <sub>2</sub> ] <sub>n</sub>                                        | $2.39 \times 10^4$ | MDZ        | 7         |
| {[Cd <sub>3</sub> (TDCPB) $\cdot$ 2DMAc] $\cdot$ DMAc $\cdot$ 4H <sub>2</sub> O}                                   | $7.46 \times 10^4$ | NFT        | 8         |
| RhB@Tb-dcpcpt                                                                                                      | $3.78 \times 10^4$ | NZF        | 9         |
|                                                                                                                    | $3.99 \times 10^4$ | NFT        | 9         |
| RhB-CDs@[Cu <sub>2</sub> L(OH)] <sub>n</sub>                                                                       | $1.98 \times 10^4$ | NZF        | 10        |
|                                                                                                                    | $2.09 \times 10^4$ | NFT        | 10        |
|                                                                                                                    | $4.0 \times 10^3$  | TCS        | 10        |
|                                                                                                                    | $1.38 \times 10^4$ | NFX        | 10        |
|                                                                                                                    | $2.5 \times 10^4$  | CPFEX      | 10        |
| 1 $\supset$ DSM                                                                                                    | $1.13 \times 10^5$ | NZF        | 11        |
|                                                                                                                    | $5.85 \times 10^4$ | FZD        | 11        |
|                                                                                                                    | $9.5 \times 10^3$  | DTZ        | 11        |
|                                                                                                                    | $1.08 \times 10^4$ | ODZ        | 11        |
|                                                                                                                    | $7.41 \times 10^3$ | RDZ        | 11        |
| 1 $\supset$ HPTS                                                                                                   | $1.72 \times 10^4$ | NZF        | 12        |
|                                                                                                                    | $1.01 \times 10^4$ | NFT        | 12        |
|                                                                                                                    | $1.72 \times 10^4$ | FZD        | 12        |
| DMASM@2                                                                                                            | $3.1 \times 10^4$  | MDZ        | this work |
|                                                                                                                    | $3.2 \times 10^4$  | DTZ        | this work |

## References

1. D. Zhao, X. H. Liu, Y. Zhao, P. Wang, Y. Liu, M. Azam, S. I. Al-Resayes, Y.

- Lu and W. Y. Sun, *J. Mater. Chem. A*, 2017, **5**, 15797-15807.
2. Z. S. Qin, W. W. Dong, J. Zhao, Y. P. Wu, Z. F. Tian, Q. C. Zhang and D. S. Li, *Eur. J. Inorg. Chem.*, 2018, **2018**, 186-193.
  3. B. X. Dong, Y. M. Pan, W. L. Liu and Y. L. Teng, *Cryst. Growth Des.* 2018, **18**, 431-440.
  4. H. Pan, S. Wang, X. Dao and Y. Ni, *Inorg. Chem.*, 2018, **57**, 1417-1425.
  5. B. Zhang, P. Y. Guo, L. N. Ma, B. Liu, L. Hou and Y. Y. Wang, *Inorg. Chem.*, 2020, **59**, 5231-5239.
  6. F. Zhang, H. Yao, T. Chu, G. Zhang, Y. Wang and Y. Yang, *Chem. Eur. J.*, 2017, **23**, 10293-10300.
  7. J. M. Li, R. Li and X. Li, *CrystEngComm*, 2018, **20**, 4962-4972.
  8. Q. Q. Zhu, Q. S. Zhou, H. W. Zhang, W. W. Zhang, D. Q. Lu, M. T. Guo, Y. Yuan, F. X. Sun and H. M. He, *Inorg. Chem.*, 2020, **59**, 1323-1331.
  9. M. Yu, Y. Xie, X. Wang, Y. Li and G. Li, *ACS Appl. Mater. Inter.*, 2019, **11**, 21201-21210.
  10. K. Zhu, R. Fan, X. Zheng, P. Wang, W. Chen, T. Sun, S. Gai, X. Zhou and Y. Yang, *J. Mater. Chem. C*, 2019, **7**, 15057-15065..
  11. H. R. Fu, Y. Zhao, T. Xie, M. L. Han, L. F. Ma and S. Q. Zang, *J. Mater. Chem. C*, 2018, **6**, 6440-6448
  12. H. R. Fu, L. B. Yan, N. T. Wu, L. F. Ma and S. Q. Zang, *J. Mater. Chem. A*, 2018, **6**, 9183-9191
